# Supplementary material for: De Novo Assembly and Characterization of Two Transcriptomes Reveal Multiple Light-Mediated Functions in the Scallop Eye (Bivalvia: Pectinidae)
Source: PLoS One. 2013 Jul 29;8(7):e69852. doi: 10.1371/journal.pone.0069852 (PMC3726758; doi:10.1371/journal.pone.0069852)
Supplement: Table S1 — List of phototransduction and circadian clock protein sequences used in blasts to identify homologs within each scallop eye transcriptome. All protein sequences were downloaded from NCBI and blasted against the transcriptomes using Geneious v. 5.5 (Biomatters). (XLSX) [file pone.0069852.s004.xlsx]

## Sheet: Sheet4
	Table S1. List of phototransduction and circadian clock protein sequences used in blasts to identify homologs within each scallop eye transcriptome. All protein sequences were downloaded from NCBI and blasted against the transcriptomes using Geneious v. 5.5.
	Pathway		Species	Accession #	Description	General name
	Phototransduction	Gq	Drosophila melanogaster	NP_725120	calmodulin, isoform B	calmodulin
			Drosophila melanogaster	NP_524661	CDP diaglyceride synthetase	CD synthase (cdsA)
			Drosophila melanogaster	ADV37647	retinal degeneration A, isoform G	DAG kinase (rdgA)
			Drosophila melanogaster	AAA28733	opsin	Gq-opsin
			Drosophila melanogaster	NP_725191	G-protein alpha 49B, isoform A	Gq-protein alpha subunit
			Drosophila melanogaster	NP_726260	inactivation no afterpotential D	inaD
			Drosophila melanogaster	AAF52504	neither activation nor afterpotential C, isoform B	ninaC (myosin III)
			Drosophila melanogaster	ACZ95198	no receptor potential A, isoform E	phospholipase C (norpA)
			Drosophila melanogaster	AAN14359	Pi3K92E, isoform B	PI kinase
			Drosophila melanogaster	NP_573055	phosphatidylinositol synthase, isoform A	PI synthase
			Drosophila melanogaster	ACZ95286	retinal degeneration b, isoform H	PI transferase (rdgB)
			Drosophila melanogaster	O96838	phosphatidylinositol-3-phosphate 5-kinase	PIP kinase
			Drosophila melanogaster	NP_476863	inactivation no afterpotential C	protein kinase C (inaC)
			Drosophila melanogaster	AAF56970	transient receptor potential	TRP
			Drosophila melanogaster	NP_476895	trp-like	TRPL
			Homo sapiens	P29973	cGMP-gated cation channel alpha-1	cGMP gated channel alpha
		Gi	Homo sapiens	Q9NQW8	cone photoreceptor cGMP-gated channel subunit beta	cGMP gated channel beta
			Mizhuopecten yessoensis	O15974	Rhodopsin, Go coupled	Go-opsin
			Homo sapiens	NP_620073	Guanine nucleotide binding protein G(o) subunit alpha isoform b	Go-protein alpha subuint
			Homo sapiens	NP_000530	rhodopsin	Gt-opsin
			Homo sapiens	NP_005263	guanine nucleotide binding G(t) subunit alpha-2	Gt-protein alpha subunit
			Homo sapiens	AAA60366	guanyl cyclase	guanyl cyclase
			Homo sapiens	NP_000431	rod cGMP-specific 3',5'-cyclic phosphodiesterase subunit beta	PDE alpha
			Homo sapiens	P35913	rod cGMP-specific 3',5'-cyclic phosphodiesterase subunit alpha	PDE beta
			Homo sapiens	P18545	retinal rod rhodopsin sensitive cGMP 3',5'-cyclic phosphodiesterase subunit gamma	PDE gamma
			Homo sapiens	CAI13122	phosudcin	phosducin
			Homo sapiens	AAC41690	protein kinase gamma subuint	protein kinase A
			Rattus norvegicus	AAQ81631	protein kinase A	protein kinase A
			Homo sapiens	NP_002894	recoverin	recoverin
			Drosophila melanogaster	AAF53644	arrestin	arrestin
		Both Gq/Gi	Homo sapiens	CAA72577	arrestin	arrestin
			Homo sapiens	AAA35922	G-protein beta subunit	G-protein beta subunit
			Drosophila melanogaster	AAS65363	G-protein beta subunit 13F, isoform F	G-protein beta subunit
			Homo sapiens	AAB70039	G-protein gamma subunit	G-protein gamma subunit
			Drosophila melanogaster	NP_724721	G-protein gamma, isoform E	G-protein gamma subunit
			Homo sapiens	AAB05929	rhodopsin kinase	rhodopsin kinase
			Drosophila melanogaster	NP_00116303	G-protein-coupled receptor kinase 1, isoform B	rhodopsin kinase
	Circadian clock		Drosophila melanogaster	NP_001014574.1	clock, isoform F	clock
			Drosophila melanogaster	NP_523964.2	clock, isoform A	clock
			Drosophila melanogaster	NP_001014576.1	clock, isoform D	clock
			Mus musculus	AAD30565.1	CLOCK	clock
			Drosophila melanogaster	AAC83828.1	cryptochrome	cryptochrome
			Mus musculus	AAD39548.1	cryptochrome 1	cryptochrome
			Mus musculus	AAD46561.1	cryptochrome 2	cryptochrome
			Drosophila melanogaster	AAF49107.1	cycle	cycle
			Mus musculus	AAH11080.1	Arntl protein	cycle
			Gallus gallus	AAP47012.1	casein kinase I epsilon	doubletime
			Drosophila melanogaster	NP_733414.1	discs overgrown, isoform A	doubletime
			Drosophila melanogaster	BAB15925.1	period	period
			Crassostrea gigas	EKC24403.1	Period circadian protein	period
			Bulla gouldiana	AAK97374.1	circadian clock protein period	period
			Mytilus galloprovincialis	ABM66066.1	putative period clock protein	period
			Mus musculus	O35973.2	PER1_MOUSE RecName: Full=Period circadian protein homolog 1; Short=mPER1; AltName: Full=Circadian clock protein PERIOD 1; AltName: Full=Circadian pacemaker protein Rigui	period
			Drosophila melanogaster	CAM59649.1	timeless	timeless
			Mus musculus	BAA76390.2	timeless	timeless
