# Supplementary material for: De Novo Assembly and Characterization of Two Transcriptomes Reveal Multiple Light-Mediated Functions in the Scallop Eye (Bivalvia: Pectinidae)
Source: PLoS One. 2013 Jul 29;8(7):e69852. doi: 10.1371/journal.pone.0069852 (PMC3726758; doi:10.1371/journal.pone.0069852)
Supplement: Table S2 — Genes annotated with Gene Ontology (GO) terms related to neural processes, vision, or retina(l) in the adult eye transctriptome of A. irradians . (XLSX) [file pone.0069852.s005.xlsx]

## Sheet: Additional file-irrad go terms
Table S2. Genes annotated with Gene Ontology (GO) terms related to neural processes, vision, or retina(l) in the adult eye transctriptome of A. irradians.
Gene name		Associated GO Term
Neural processes	spectrin alpha brain	generation of neurons, neuron projection
	alkaline phosphatase	neurogenesis
	cell division control protein 42 homolog	neurogenesis
	eukaryotic translation initiation factor subunit 1	neurogenesis
	fibrinogen and fibronectin	neurogenesis
	muscleblind-like 3	neurogenesis
	myosin via	neurogenesis
	protein casp	neurogenesis
	ras- estrogen- growth inhibitor	neurogenesis
	tetratricopeptide repeat domain 3	neurogenesis
	ubiquitin c	neurogenesis, neuron development
	beta-tubulin	neurogenesis, neuron projection
	large homolog 1	neurogenesis, neuron projection
	peptidylglycine alpha-hydroxylating monooxygenase	neurogenesis, neuron projection
	angiotensin converting enzyme	neurological system process
	beta actin	neurological system process
	cysteine sulfinic acid decarboxylase	neurological system process
	dopamine beta hydroxylase-like protein	neurological system process
	glutamate ionotropic kainate 2	neurological system process
	isoform g	neurological system process
	sodium shloride dependent amino acid transporter	neurological system process
	voltage-dependent anion channel 3	neurological system process
	actin	neurological system process, neuron projection
	inositol -trisphosphate receptor	neurological system process, neuron projection
	caveolin 3	neuromast development, neuromuscular junction
	ribosomal protein s27a	neuromuscular junction development
	ribosomal protein ubq l40e	neuromuscular junction development
	isoform h	neuromuscular synaptic transmission
	zinc and double phd fingers family 2	neuron development
	dynein light chain	neuron development, neuron projection
	ferm domain-containing	neuron differentiation
	peptidylglycine alpha-amidating isoform cra_c	neuron differentiation
	phosphatidylinositol-trisphosphate 3-phosphatase and dual-specificity protein phosphatase pten	neuron differentiation
	ccaat enhancer binding protein (c ebp) beta	neuron differentiation, neurogenesis
	calponin-like protein	neuron projection
	mechanosensory abnormality family member (mec-2)	neuron projection
	ribosomal protein s3	neuron projection
	srcr membrane form 2	neuron projection
	nicotinic acetylcholine receptor subunit a2	neurotransmitter binding
	gtp cyclohydrolase i feedback regulator	neurotransmitter metabolic process
	clathrin coat assembly protein	neurotransmitter secretion
	solute (neurotransmitter betaine gaba) family 6	neurotransmitter transport
	solute carrier family 6 (neurotransmitter glycine) member 5	neurotransmitter transport
	solute carrier family 6 member 2	neurotransmitter transport
	synaptosomal-associated 25 protein isoform a	neurotransmitter transport
	vesicle-associated membrane protein 4	neurotransmitter transport
	solute carrier family 6 (neurotransmitter taurine) member 6	neurotransmitter transporter activity
	solute carrier family 6 (neurotransmitter glycine) member 9	neurotransmitter:sodium symporter activity
	stearoyl- desaturase	regulation of action potential in neuron
	v-erb-a erythroblastic leukemia viral oncogene homolog 4	regulation of action potential in neuron
	ankyrin repeat and death domain containing 1a	regulation of neuron differentiation
	calmodulin dependent protein kinase ii	regulation of neurotransmitter secretion
Vision	excitatory amino acid transporter 2	visual behavior, neuron projection
	6a fibrillar collagen	visual perception
	collagen alpha-1	visual perception
	rhodopsin	visual perception
	secreted frizzled-related protein 5	visual perception
	calmodulin	visual perception, detection of light stimulus involved in visual perception
	hepatic leukemia factor	visual process, neurological system process
Retina(l)*	retinal dehydrogenase	camera-type eye development
	ribosomal protein l24	retina development in camera-type eye
	superoxide dismutase	retina homeostasis
	aldehyde dehydrogenase	retinal dehydrogenase activity
* - Retina(l) refers to GO terms related to the retina and GO terms related to the molecule retinal, a vitamin A derivative that binds opsin to form the visual pigment.
