# Supplementary material for: De Novo Assembly and Characterization of Two Transcriptomes Reveal Multiple Light-Mediated Functions in the Scallop Eye (Bivalvia: Pectinidae)
Source: PLoS One. 2013 Jul 29;8(7):e69852. doi: 10.1371/journal.pone.0069852 (PMC3726758; doi:10.1371/journal.pone.0069852)
Supplement: Table S3 — Genes annotated with Gene Ontology (GO) terms related to neural processes, vision, or retina in the adult eye transcriptome of P. magellanicus . (XLSX) [file pone.0069852.s006.xlsx]

## Sheet: Additional file-magell go terms
Table S3. Genes annotated with Gene Ontology (GO) terms related to neural processes, vision, or retina(l) in the adult eye transcriptome of P. magellanicus.
Gene Name		Associated GO term
Neural Processes	band -like protein 1	generation of neurons
	ras gtpase-activating protein 1	generation of neurons
	14-3-3-like protein	neurogenesis
	26s proteasome non-atpase regulatory subunit 14-like	neurogenesis
	26s proteasome non-atpase regulatory subunit 6	neurogenesis
	26s proteasome subunit rpn11a rpn11a-1	neurogenesis
	40s ribosomal protein s10	neurogenesis
	40s ribosomal protein s11	neurogenesis
	40s ribosomal protein s5	neurogenesis
	40s ribosomal protein s8-like	neurogenesis
	60s ribosomal protein l28-2	neurogenesis
	70 kda peptidyl-prolyl isomerase-like	neurogenesis
	abl interactor 2	neurogenesis
	acetylcholine receptor subunit alpha	neurogenesis
	actin-79b	neurogenesis
	actin-related protein 3	neurogenesis
	acyl- -binding domain-containing protein 6	neurogenesis
	acyl- synthetase bubblegum family member 2	neurogenesis
	adapter molecule crk	neurogenesis
	adaptor-related protein complex beta 2 subunit	neurogenesis
	adaptor-related protein complex sigma 2 subunit	neurogenesis
	adenylate kinase b-like	neurogenesis
	adenylate kinase mitochondrial	neurogenesis
	adenylyl cyclase-associated protein 2	neurogenesis
	aldehyde dehydrogenase family 2 member c4-like	neurogenesis
	aldehyde mitochondrial	neurogenesis
	alkaline phosphatase	neurogenesis
	alkaline tissue-nonspecific isozyme	neurogenesis
	alpha-n-acetylglucosaminidase	neurogenesis
	alzheimer s disease amyloid a4 protein	neurogenesis
	ankyrin repeat and kh domain-containing protein 1	neurogenesis
	ankyrin repeat and sam domain-containing protein 1a	neurogenesis
	ankyrin repeat domain-containing protein 13b	neurogenesis
	ankyrin repeat domain-containing protein 39	neurogenesis
	ankyrin-1	neurogenesis
	ankyrin-2	neurogenesis
	ankyrin-3	neurogenesis
	ap-1 complex subunit sigma-1	neurogenesis
	ap-2 complex subunit mu	neurogenesis
	ap-2 complex subunit sigma	neurogenesis
	apoptosis-antagonizing transcription factor	neurogenesis
	apoptosis-inducing factor mitochondrial	neurogenesis
	aprotein amalgam	neurogenesis
	arac-beta serine threonine-protein kinase b	neurogenesis
	at-rich interactive domain-containing protein 1a	neurogenesis
	ataxin-2	neurogenesis
	atlastin-1	neurogenesis
	B Cell membrane protein CD22	neurogenesis
	B-cell CLL/lymphoma 11A	neurogenesis
	b-cell translocation gene 1 protein	neurogenesis
	basic blue protein	neurogenesis
	basic leucine zipper and w2 domain-containing protein 1	neurogenesis
	basic leucine zipper and w2 domain-containing protein 2-like	neurogenesis
	beclin-1-like protein	neurogenesis
	beta chain spectrin	neurogenesis
	beta chimerin	neurogenesis
	beta tubulin	neurogenesis
	beta-G spectrin	neurogenesis
	beta-transducin repeat containing protein	neurogenesis
	beta-tubulin	neurogenesis
	bicaudal d-related protein 1	neurogenesis
	biglycan	neurogenesis
	bone morphogenetic protein receptor type-1b	neurogenesis
	brain protein i3	neurogenesis
	brain-specific angiogenesis inhibitor 1	neurogenesis
	brg1	neurogenesis
	brother of cdo	neurogenesis
	c-jun	neurogenesis
	cadherin egf lag seven-pass g-type receptor	neurogenesis
	cadherin-23	neurogenesis
	calcineurin	neurogenesis
	calcium calmodulin-dependent protein kinase type 1	neurogenesis
	calcium calmodulin-dependent protein kinase type ii	neurogenesis
	calcium voltage- p q alpha 1a subunit	neurogenesis
	calcium-activated potassium channel slowpoke	neurogenesis
	calcium-binding protein ncs-1	neurogenesis
	calcium-dependent protein kinase 4	neurogenesis
	calcium-dependent protein kinase c	neurogenesis
	calreticulin	neurogenesis
	calumenin	neurogenesis
	cAMP responsive element binding protein	neurogenesis
	caprin-1	neurogenesis
	carbohydrate sulfotransferase 11	neurogenesis
	casein kinase i alpha	neurogenesis
	casein kinase ii subunit alpha-like	neurogenesis
	casein kinase ii subunit beta	neurogenesis
	caskin-1	neurogenesis
	caspase-1	neurogenesis
	catenin (cadherin-associated protein)	neurogenesis
	CCAAT/enhancer binding protein	neurogenesis
	ccdc42 homolog	neurogenesis
	Cdc20	neurogenesis
	CDC42-binding protein kinase alpha	neurogenesis
	cdk5 regulatory subunit-associated protein 2	neurogenesis
	cell adhesion molecule	neurogenesis
	cell division cycle protein 48 homolog	neurogenesis
	centaurin-gamma-1a	neurogenesis
	centrosomal protein 290kDa isoform 1	neurogenesis
	chloride intracellular channel protein 5	neurogenesis
	chromodomain-helicase-dna-binding protein 5	neurogenesis
	clathrin assembly protein AP180	neurogenesis
	clathrin heavy chain 1	neurogenesis
	cleavage and polyadenylation specificity factor subunit 2	neurogenesis
	clip-associating protein 1	neurogenesis
	coatomer subunit alpha-2	neurogenesis
	coiled-coil domain containing 88C	neurogenesis
	cold-inducible rna-binding protein	neurogenesis
	collagen alpha-3 chain	neurogenesis
	collagen alpha-4 chain	neurogenesis
	collybistin II, putative	neurogenesis
	constitutive photomorphogenesis protein 10	neurogenesis
	contactin-3	neurogenesis
	contactin-associated protein 1	neurogenesis
	cop9 constitutive photomorphogenic homolog subunit 2	neurogenesis
	cop9 signalosome complex subunit	neurogenesis
	copper-transporting atpase 2	neurogenesis
	creb-binding protein	neurogenesis
	cyclin-dependent kinase 12	neurogenesis
	cyclin-dependent kinase 5 activator	neurogenesis
	cyclin-dependent kinase-like 1	neurogenesis
	cyclin-dependent kinase-like 2	neurogenesis
	cytoplasmic fmr1-interacting protein 2	neurogenesis
	cytosolic fe-s cluster assembly factor narfl	neurogenesis
	daf-12 c4 (daf-12)	neurogenesis
	death domain-containing membrane protein nradd	neurogenesis
	dedicator of cytokinesis protein 1	neurogenesis
	dedicator of cytokinesis protein 7	neurogenesis
	dedicator of cytokinesis protein 9	neurogenesis
	developmentally-regulated gtp-binding protein 2- 2	neurogenesis
	diacylglycerol kinase beta	neurogenesis
	disks large 1 tumor suppressor protein	neurogenesis
	dna excision repair protein ercc-6	neurogenesis
	dna replication licensing factor mcm2	neurogenesis
	dna topoisomerase 2-beta	neurogenesis
	dna-binding protein inhibitor id-2	neurogenesis
	dna-binding protein smubp-2	neurogenesis
	dna-directed rna polymerase iii subunit rpc6	neurogenesis
	dual adapter for phosphotyrosine and 3-phosphotyrosine and 3-phosphoinositide	neurogenesis
	dynein light chain flagellar outer arm-like	neurogenesis
	dystonin	neurogenesis
	dystrobrevin binding protein	neurogenesis
	dystrophin	neurogenesis
	early growth response protein 1	neurogenesis
	ecdysone-induced protein 75b	neurogenesis
	ef-hand domain-containing protein d2	neurogenesis
	electroneutral sodium bicarbonate exchanger 1	neurogenesis
	elphidium williamsoni clone 652_2 actin type 2	neurogenesis
	endonuclease/reverse transcriptase	neurogenesis
	endoplasmin homolog	neurogenesis
	endoribonuclease dicer	neurogenesis
	ETS domain-containing protein Elk-4, putative	neurogenesis
	eukaryotic translation initiation factor	neurogenesis
	eukaryotic translation initiation factor 2 subunit 2	neurogenesis
	eukaryotic translation initiation factor 3	neurogenesis
	eukaryotic translation initiation factor 4E	neurogenesis
	eukaryotic translation initiation factor 5	neurogenesis
	ezrin	neurogenesis
	f-spondin	neurogenesis
	fact complex subunit ssrp1	neurogenesis
	failed axon connections homolog	neurogenesis
	fascin	neurogenesis
	fatty acid 2-hydroxylase	neurogenesis
	fibrillin-1	neurogenesis
	fibroblast growth factor receptor 2	neurogenesis
	fibroblast growth factor receptor 4	neurogenesis
	fibronectin type iii domain-containing protein 1	neurogenesis
	fibropellin-1	neurogenesis
	FK506-binding protein 5	neurogenesis
	fli transcription factor	neurogenesis
	flotillin-1	neurogenesis
	flotillin-2	neurogenesis
	focal adhesion kinase 1	neurogenesis
	frizzled-3	neurogenesis
	frizzled-4	neurogenesis
	g protein alpha subunit go	neurogenesis
	g-box-binding factor	neurogenesis
	g-protein coupled receptor 98	neurogenesis
	gastrulation defective protein 1 homolog	neurogenesis
	gelsolin-like protein 1	neurogenesis
	gene region containing u1 sequence 2	neurogenesis
	general transcription factor 3c polypeptide 2	neurogenesis
	glutamate-rich wd repeat-containing protein 1-like	neurogenesis
	glutaredoxin family protein	neurogenesis
	glycine-rich rna-binding protein grp2a	neurogenesis
	glycogen synthase kinase-3 beta	neurogenesis
	golgi-associated microtubule-binding protein HOOK3,	neurogenesis
	gpi ethanolamine phosphate transferase 1	neurogenesis
	gtp-binding nuclear protein ran-1-like	neurogenesis
	gtp-binding protein rab-3d	neurogenesis
	gtp-binding protein rad	neurogenesis
	guanine nucleotide exchange factor	neurogenesis
	guanine nucleotide-binding protein g g g subunit gamma-12	neurogenesis
	guanine nucleotide-binding protein subunit alpha-13-like	neurogenesis
	guanine nucleotide-binding protein subunit beta-2-like	neurogenesis
	h aca ribonucleoprotein complex subunit 4	neurogenesis
	harmonin	neurogenesis
	heat shock cognate 71	neurogenesis
	heat shock cognate protein 80	neurogenesis
	heat shock protein 81-1	neurogenesis
	heat shock protein 83-like	neurogenesis
	heat shock protein 90	neurogenesis
	heat shock protein sti-like	neurogenesis
	heavy polypeptide smooth muscle	neurogenesis
	hedgling	neurogenesis
	heparan sulfate proteoglycan 2	neurogenesis
	hepatocyte nuclear factor 4-beta	neurogenesis
	heterogeneous nuclear ribonucleoprotein d-like	neurogenesis
	High Incidence of Males (increased X chromosome loss) family member (him-4)	neurogenesis
	high mobility group b protein 1	neurogenesis
	high mobility group-t protein	neurogenesis
	histone deacetylase	neurogenesis
	histone deacetylase 6	neurogenesis
	histone deacetylase rpd3	neurogenesis
	hmg box containing transcription factor tcf	neurogenesis
	homeobox protein cut-like 1-like	neurogenesis
	homeobox protein pknox2	neurogenesis
	homeobox protein unc-4 homolog	neurogenesis
	homeobox transcription factor (gsc gene)	neurogenesis
	homeodomain interacting protein kinase 2	neurogenesis
	Hook-related protein 1	neurogenesis
	hox12 protein isoform 3	neurogenesis
	hsp90 co-chaperone cdc37	neurogenesis
	hypothetical protein BRAFLDRAFT_86694	neurogenesis
	hypothetical protein TTHERM_00129860	neurogenesis
	hypoxia-inducible factor 1-alpha	neurogenesis
	inactive tyrosine-protein kinase 7	neurogenesis
	inhibitor of nuclear factor kappa-b kinase subunit epsilon	neurogenesis
	inorganic pyrophosphatase 2-like	neurogenesis
	insulin gene enhancer protein isl-1	neurogenesis
	integrin beta cgh	neurogenesis
	kaan- - ornithorhynchus anatinus ref	neurogenesis
	kakapo	neurogenesis
	kanadaptin	neurogenesis
	katanin p60 atpase-containing subunit	neurogenesis
	kif1-binding protein homolog	neurogenesis
	kinesin-like protein	neurogenesis
	kinesin-like protein klp6	neurogenesis
	kn motif and ankyrin repeat domain-containing protein 1	neurogenesis
	krueppel-like factor 5-like	neurogenesis
	laminin subunit alpha-2	neurogenesis
	laminin subunit beta-1	neurogenesis
	laminin subunit gamma-1	neurogenesis
	leucine rich domain-containing protein, putative	neurogenesis
	leucine-rich repeat-containing g-protein coupled receptor 6	neurogenesis
	lipoma HMGIC fusion partner-like 3	neurogenesis
	lissencephaly-1 homolog	neurogenesis
	long chain acyl- synthetase 8-like	neurogenesis
	long-chain acyl- synthetase 5	neurogenesis
	Long-chain-fatty-acid--CoA ligase 3	neurogenesis
	low-density lipoprotein receptor-related protein 1	neurogenesis
	low-density lipoprotein receptor-related protein 2	neurogenesis
	low-density lipoprotein receptor-related protein 6	neurogenesis
	lymphoid enhancer-binding factor 1	neurogenesis
	lysine-specific demethylase 4b	neurogenesis
	lysosomal hexosaminidase	neurogenesis
	maguk p55 subfamily member 5	neurogenesis
	manganese superoxide dismutase	neurogenesis
	map kinase-activated protein kinase 3	neurogenesis
	map microtubule affinity-regulating kinase 3	neurogenesis
	mediator of rna polymerase ii transcription subunit 12-like protein	neurogenesis
	mediator of rna polymerase ii transcription subunit 29	neurogenesis
	mediator of RNA polymerase II transcription, subunit 28 homolog isoform 2	neurogenesis
	megakaryocyte-associated tyrosine-protein kinase	neurogenesis
	met proto-oncogene precursor	neurogenesis
	metal transporter	neurogenesis
	microtubule-actin cross-linking factor isoforms 1 2 3 5	neurogenesis
	microtubule-associated protein futsch	neurogenesis
	misshapen-like kinase 3	neurogenesis
	mitochondrial import inner membrane translocase subunit tim16-a	neurogenesis
	mitogen-activated protein kinase 3	neurogenesis
	mitogen-activated protein kinase 6	neurogenesis
	mitogen-activated protein kinase 8b	neurogenesis
	molluscan defence molecule precursor	neurogenesis
	MORN repeat containing 1	neurogenesis
	morone saxatilis myosin vi isoform	neurogenesis
	mothers against decapentaplegic homolog 5	neurogenesis
	msx2-interacting protein	neurogenesis
	multiple epidermal growth factor-like domains protein 10	neurogenesis
	multiple epidermal growth factor-like domains protein 11	neurogenesis
	multiple epidermal growth factor-like domains protein 6	neurogenesis
	Muscle-specific protein 300 CG33715-PD	neurogenesis
	myelin expression factor 2	neurogenesis
	myocyte enhancer factor 2	neurogenesis
	myosin essential light chain	neurogenesis
	myosin heavy	neurogenesis
	myosin light chain kinase	neurogenesis
	myosin regulatory light	neurogenesis
	myosin-2 essential light chain	neurogenesis
	myosin-X,	neurogenesis
	nad-dependent protein deacetylase sirtuin-2	neurogenesis
	NAD(+) ADP-ribosyltransferase-3-like protein	neurogenesis
	nedd8	neurogenesis
	neogenin	neurogenesis
	nephrin	neurogenesis
	Nephrin precursor, putative	neurogenesis
	nephrocystin-1	neurogenesis
	neurabin-1	neurogenesis
	neural cell adhesion molecule 1	neurogenesis
	neuroblastoma ras viral (v-ras) oncogene homolog	neurogenesis
	neurofibromin	neurogenesis
	neurogenic locus notch homolog protein 2	neurogenesis
	neurogenic locus notch, putative	neurogenesis
	neuroglian	neurogenesis
	neuron navigator 2	neurogenesis
	neuronal migration protein doublecortin	neurogenesis
	neuropeptides b w receptor type 2	neurogenesis
	nicotinic acetylcholine receptor subunit type G	neurogenesis
	nidogen-1	neurogenesis
	nkap-like	neurogenesis
	non muscle myosin	neurogenesis
	novel protein vertebrate basic leucine zipper and w2 domains 2	neurogenesis
	nuak family snf1-like kinase 1	neurogenesis
	nuclear cap-binding protein subunit 1	neurogenesis
	nuclear factor i a	neurogenesis
	nuclear receptor subfamily 1 DEF	neurogenesis
	nuclear valosin-containing	neurogenesis
	nucleolar mif4g domain-containing protein 1-like	neurogenesis
	nucleoside diphosphate kinase	neurogenesis
	nucleosome chromatin assembly factor group	neurogenesis
	obscurin, cytoskeletal calmodulin and titin-interacting RhoGEF	neurogenesis
	ornithine aminotransferase	neurogenesis
	outer arm dynein light chain 4-like	neurogenesis
	oxoglutarate dehydrogenase- 2	neurogenesis
	p21-activated kinase 1	neurogenesis
	pab-dependent poly -specific ribonuclease subunit 2	neurogenesis
	paired box 5	neurogenesis
	paired box protein pax-2a	neurogenesis
	partitioning defective protein 5	neurogenesis
	patched domain of vertebrates	neurogenesis
	pdz domain-containing protein 2	neurogenesis
	peptidyl-prolyl cis-trans isomerase fkbp65	neurogenesis
	peroxidasin homolog	neurogenesis
	peroxisomal targeting signal 2 receptor	neurogenesis
	perq amino acid-rich with gyf domain-containing protein 2	neurogenesis
	pescadillo	neurogenesis
	ph and sec7 domain-containing protein 3	neurogenesis
	phaseolus vulgaris cv early gallatin phaseolus vulgaris	neurogenesis
	phd finger protein 14	neurogenesis
	phosphatidylinositide phosphatase sac1- 2	neurogenesis
	phosphatidylinositol 4-phosphate 5-kinase type-1 alpha	neurogenesis
	phosphatidylinositol-binding clathrin assembly protein lap	neurogenesis
	phosphorylase gamma	neurogenesis
	phosphorylase kinase gamma subunit, putative	neurogenesis
	pleckstrin domain-containing protein 1	neurogenesis
	pleckstrin domain-containing protein 2	neurogenesis
	pleckstrin homology domain containing, family H r 1	neurogenesis
	pleckstrin homology domain-containing family g member 5	neurogenesis
	plexin A	neurogenesis
	plexin-b2	neurogenesis
	polyadenylate-binding protein 2	neurogenesis
	polybromo-1	neurogenesis
	polycomb group protein embryonic flower 2-like	neurogenesis
	polycomb protein eed	neurogenesis
	potassium voltage-gated kqt-like member 5	neurogenesis
	pre--processing factor 19	neurogenesis
	predicted protein tyrosine phosphatase	neurogenesis
	prefoldin subunit 6	neurogenesis
	presenilin 1-2	neurogenesis
	probable adp-ribosylation factor gtpase-activating protein agd13-like	neurogenesis
	Probable ATP-dependent RNA helicase kurz	neurogenesis
	probable global transcription activator snf2l1	neurogenesis
	probable nuclear hormone receptor hr3	neurogenesis
	probable serine threonine-protein kinase pats1	neurogenesis
	probable trna threonylcarbamoyladenosine biosynthesis protein osgep	neurogenesis
	proteasome subunit beta type-4	neurogenesis
	proteasome subunit c10-11	neurogenesis
	protein arginine methyltransferase 1	neurogenesis
	protein casp	neurogenesis
	protein coracle	neurogenesis
	protein diaphanous homolog 1	neurogenesis
	protein fam50 homolog	neurogenesis
	protein held out wings	neurogenesis
	protein jagged-1	neurogenesis
	protein kinase c inhibitor protein 1	neurogenesis
	protein lap4	neurogenesis
	protein phosphatase catalytic beta isoform	neurogenesis
	protein phosphatase catalytic gamma isozyme	neurogenesis
	protein phosphatase regulatory subunit b gamma	neurogenesis
	protein rufy3	neurogenesis
	protein scabrous	neurogenesis
	protein scribble homolog	neurogenesis
	protein sda1 homolog	neurogenesis
	protein sda1 homolog	neurogenesis
	protein sidekick-2	neurogenesis
	protein translation factor sui1 homolog	neurogenesis
	protein transport protein sec61 subunit gamma	neurogenesis
	protein wnt-6	neurogenesis
	protein-methionine sulfoxide oxidase mical3a	neurogenesis
	protocadherin fat 1	neurogenesis
	protocadherin-like wing polarity protein stan	neurogenesis
	PTK7 protein tyrosine kinase 7 isoform a precursor	neurogenesis
	puff-specific protein bx42-like	neurogenesis
	Q50 paired-like homeodomain transcription factor	neurogenesis
	rac gene for rac gtpase protein	neurogenesis
	radixin-like	neurogenesis
	ran binding protein 9- 2	neurogenesis
	rap guanine nucleotide exchange factor 2	neurogenesis
	rar-related orphan receptor 1	neurogenesis
	ras-like gtp-binding protein rho	neurogenesis
	ras-like protein family member 12	neurogenesis
	ras-related nuclear	neurogenesis
	ras-related protein rab-11b	neurogenesis
	ras-related protein rab11a-like	neurogenesis
	receptor tyrosine-protein kinase erbb-2	neurogenesis
	receptor-type tyrosine-protein phosphatase c	neurogenesis
	receptor-type tyrosine-protein phosphatase gamma	neurogenesis
	receptor-type tyrosine-protein phosphatase kappa	neurogenesis
	receptor-type tyrosine-protein phosphatase t	neurogenesis
	regulatory light chain	neurogenesis
	relaxin receptor 1	neurogenesis
	repulsive guidance molecule a	neurogenesis
	reticulon-like protein b4	neurogenesis
	retinoblastoma-like protein 2	neurogenesis
	rho gdp-dissociation inhibitor 1	neurogenesis
	rho gtpase-activating protein 26	neurogenesis
	rho guanine nucleotide exchange factor 10	neurogenesis
	rho guanine nucleotide exchange factor 16	neurogenesis
	Rho guanine nucleotide exchange factor, putative	neurogenesis
	rho-associated protein kinase 1	neurogenesis
	rho-associated protein kinase 2	neurogenesis
	Rho-associated protein kinase, putative	neurogenesis
	rho-related btb domain-containing protein 1	neurogenesis
	rho-related gtp-binding protein	neurogenesis
	ribosomal protein l28	neurogenesis
	ribosomal protein s10	neurogenesis
	ribosomal protein s11	neurogenesis
	ribosomal protein s6 kinase alpha-5	neurogenesis
	ribosomal protein s6 kinase beta-1-like	neurogenesis
	ribosomal protein s8	neurogenesis
	ribosome biogenesis protein wdr12 homolog	neurogenesis
	ring finger family protein	neurogenesis
	ring finger protein 10	neurogenesis
	ring-box protein 1a	neurogenesis
	rna and export factor-binding protein 2-like	neurogenesis
	RNA binding motif protein 28	neurogenesis
	rna polymerase-associated protein leo1	neurogenesis
	rna-binding protein 28	neurogenesis
	rna-binding protein pno1	neurogenesis
	roundabout homolog 2	neurogenesis
	ruvb-like 2-like	neurogenesis
	scaffold attachment factor b2	neurogenesis
	scavenger receptor class f member 1	neurogenesis
	scavenger receptor class F, member 2	neurogenesis
	sec1 family domain-containing protein 1	neurogenesis
	Sema-2a CG4700-PA, isoform A	neurogenesis
	septin 7	neurogenesis
	septin-2-like	neurogenesis
	Sequestosome 1 isoform 3	neurogenesis
	serine arginine-rich splicing factor 2	neurogenesis
	serine arginine-rich splicing factor 2-like	neurogenesis
	serine threonine protein kinase	neurogenesis
	serine threonine-protein kinase	neurogenesis
	serine threonine-protein kinase-transforming protein rmil	neurogenesis
	serine threonine-protein phosphatase 2a regulatory subunit epsilon	neurogenesis
	serine threonine-protein phosphatase 4 catalytic subunit b-like	neurogenesis
	serine threonine-protein phosphatase pp2a catalytic subunit	neurogenesis
	sh3 and multiple ankyrin repeat domains protein 1	neurogenesis
	sh3 and multiple ankyrin repeat domains protein 3	neurogenesis
	shc-transforming protein 1	neurogenesis
	shootin-1	neurogenesis
	signal-induced proliferation-associated 1 like 2	neurogenesis
	SIX class homeodomain transcription factor	neurogenesis
	SLIT-ROBO Rho GTPase-activating protein, putative	neurogenesis
	small nuclear ribonucleo protein	neurogenesis
	small nuclear ribonucleoprotein d2-like protein	neurogenesis
	small nuclear ribonucleoprotein sm d3	neurogenesis
	snf-related serine threonine-protein kinase	neurogenesis
	sod2 for manganese-superoxide	neurogenesis
	sodium channel and clathrin linker 1	neurogenesis
	sodium channel protein 1 brain	neurogenesis
	sorting nexin-27	neurogenesis
	sorting nexin-29	neurogenesis
	sparc-related modular calcium-binding protein 2	neurogenesis
	spectrin alpha chain	neurogenesis
	spectrin beta 2	neurogenesis
	spectrin beta non-erythrocytic 1	neurogenesis
	sperm-associated antigen 1	neurogenesis
	splicing arginine serine-rich 2	neurogenesis
	splicing factor 14 kda subunit	neurogenesis
	spondin-2	neurogenesis
	stathmin	neurogenesis
	stress-activated protein kinase jnk	neurogenesis
	striatin	neurogenesis
	stromal cell-derived factor 2-like	neurogenesis
	sulfakinin receptor, putative	neurogenesis
	superoxide dismutase	neurogenesis
	suppressor of cytokine signaling 6	neurogenesis
	suppressor of K+ transport growth defect-like protein	neurogenesis
	suppressor of swi4 1 homolog	neurogenesis
	surfeit locus protein 6 homolog	neurogenesis
	sus scrofa clone: expressed in dendritic cells	neurogenesis
	swi snf matrix actin dependent regulator of subfamily member 4	neurogenesis
	swi snf matrix actin dependent regulator of subfamily member 5	neurogenesis
	swi2-related protein	neurogenesis
	swl389-84 type 1 kh domain-containing protein	neurogenesis
	synaptosomal-associated 25 protein isoform a	neurogenesis
	syntaxin	neurogenesis
	synthetic construct clone calreticulin	neurogenesis
	taf12 rna polymerase tata box binding protein -associated isoform cra_b	neurogenesis
	talin-1	neurogenesis
	talin-2	neurogenesis
	tankyrase-2	neurogenesis
	techylectin-5b	neurogenesis
	telomerase protein component 1-like	neurogenesis
	tenascin-x	neurogenesis
	tensin-3	neurogenesis
	testican-2	neurogenesis
	tetraspan membrane protein of hair cell stereocilia homolog	neurogenesis
	thrombospondin-1	neurogenesis
	tight junction protein tama, putative	neurogenesis
	tight junction protein zo-1	neurogenesis
	titin	neurogenesis
	toll	neurogenesis
	trafficking protein particle complex subunit 1	neurogenesis
	transcription factor glial cells missing 2	neurogenesis
	transcription factor maf	neurogenesis
	transcription factor protein Tcf	neurogenesis
	transcription factor sox-1b	neurogenesis
	transcription initiation factor iia gamma	neurogenesis
	transcription initiation factor iia subunit	neurogenesis
	transcriptional adapter 2-beta	neurogenesis
	transforming acidic coiled-coil-containing protein 2	neurogenesis
	transient receptor potential channel 7	neurogenesis
	transient receptor potential-gamma protein	neurogenesis
	transitional endoplasmic reticulum atpase	neurogenesis
	translation initiation factor eif-2b subunit beta	neurogenesis
	translation initiation factor eif-2b subunit delta	neurogenesis
	triple functional domain protein	neurogenesis
	trithorax group protein osa	neurogenesis
	tryptophan oxygenase	neurogenesis
	tumor necrosis factor receptor superfamily member 16	neurogenesis
	twinfilin-1	neurogenesis
	twitchin	neurogenesis
	two-component response regulator-like prr95-like	neurogenesis
	tyrosine phosphatase 1	neurogenesis
	tyrosine-protein kinase	neurogenesis
	tyrosine-protein phosphatase non-receptor type 1	neurogenesis
	tyrosine-protein phosphatase non-receptor type 11	neurogenesis
	tyrosine-protein phosphatase non-receptor type 12	neurogenesis
	tyrosine-protein phosphatase non-receptor type 61f	neurogenesis
	u1 small nuclear ribonucleoprotein a	neurogenesis
	u1 small nuclear ribonucleoprotein c	neurogenesis
	u2 small nuclear riboprotein auxiliary factor 50	neurogenesis
	u2 small nuclear rna auxiliary factor 2	neurogenesis
	u3 small nucleolar rna-associated protein 18 homolog	neurogenesis
	ubiquitin carboxyl-terminal hydrolase isozyme l3	neurogenesis
	ubiquitin-conjugating enzyme e2 10-like	neurogenesis
	ubiquitin-conjugating enzyme e2 5-like	neurogenesis
	ubiquitin-conjugating enzyme e2 d4	neurogenesis
	ubiquitin-like protein 5-like	neurogenesis
	unc-76 (unc-76)	neurogenesis
	unconventional myosin-viia	neurogenesis
	unconventional myosin-xv	neurogenesis
	unconventional myosin-xviiia	neurogenesis
	UNCoordinated family member (unc-70)	neurogenesis
	UTP14, U3 small nucleolar ribonucleoprotein, homolog A (yeast)	neurogenesis
	v-ral simian leukemia viral oncogene homolog a (ras related)	neurogenesis
	VAB-10A protein	neurogenesis
	villin-1	neurogenesis
	vitellogenin receptor, putative	neurogenesis
	voltage-dependent sodium channel	neurogenesis
	voltage-dependent t-type calcium channel alpha-1 subunit isoform a	neurogenesis
	von willebrand factor type egf and pentraxin domain-containing protein 1	neurogenesis
	wash complex subunit strumpellin	neurogenesis
	wd repeat-containing protein 16	neurogenesis
	wiskott-aldrich syndrome protein	neurogenesis
	Wnt16 like	neurogenesis
	zinc finger and btb domain-containing protein 47	neurogenesis
	Zinc finger homeobox protein 3	neurogenesis
	Zinc finger protein 28 (Zinc finger protein KOX24)	neurogenesis
	zinc finger protein 471,	neurogenesis
	zinc finger protein dpf3	neurogenesis
	zinc finger protein gfi-1	neurogenesis
	zinc finger protein glis3-like	neurogenesis
	zygotic dna replication licensing factor mcm3	neurogenesis
	1-phosphatidylinositol -bisphosphate phosphodiesterase beta-3	neurological system process
	1-phosphatidylinositol -bisphosphate phosphodiesterase classes i and ii	neurological system process
	28s ribosomal protein mitochondrial	neurological system process
	4-aminobutyrate aminotransferase nuclear gene encoding mitochondrial	neurological system process
	acetylcholine binding protein 2	neurological system process
	acid-sensing ion channel 4	neurological system process
	active breakpoint cluster region-related protein	neurological system process
	adenylate cyclase type 9	neurological system process
	agrin	neurological system process
	aldehyde dehydrogenase family 7 member a1	neurological system process
	alpha-actinin	neurological system process
	ankyrin 2,3/unc44	neurological system process
	atp-binding cassette sub-family a member 1	neurological system process
	atp-binding cassette sub-family a member 3-like	neurological system process
	ATP-binding cassette transporter sub-family A	neurological system process
	atp-binding sub-family c (cftr mrp) member 2	neurological system process
	atp-sensitive inward rectifier potassium channel 8	neurological system process
	BAI1-associated protein, putative	neurological system process
	bardet-biedl syndrome 7 protein homolog	neurological system process
	beta-arrestin-1-like	neurological system process
	cadherin-related tumor suppressor	neurological system process
	calmodulin	neurological system process
	camp and camp-inhibited cgmp 3,5-cyclic phosphodiesterase	neurological system process
	camp-dependent protein kinase type ii regulatory subunit	neurological system process
	cation chloride cotransporter, putative	neurological system process
	cgmp-specific 3 -cyclic phosphodiesterase	neurological system process
	chloride channel protein 2	neurological system process
	chromatin remodeling factor CHROM1 isoform 1	neurological system process
	chromodomain-helicase-dna-binding protein 6	neurological system process
	collagen alpha-1 chain	neurological system process
	collagen pro alpha-chain	neurological system process
	cryptochrome-1	neurological system process
	cystinosin homolog	neurological system process
	diamine acetyltransferase 1	neurological system process
	dihydropyrimidinase	neurological system process
	dipeptidyl peptidase 4 membrane form	neurological system process
	echinoderm microtubule-associated 6	neurological system process
	epoxide hydrolase 2-like	neurological system process
	Excitatory amino acid transporter 1	neurological system process
	excitatory amino acid transporter 2	neurological system process
	excitatory amino acid transporter 3	neurological system process
	f-actin cross-linking protein	neurological system process
	fad NAD binding oxidoreductases, putative	neurological system process
	ferm and pdz domain-containing protein 4	neurological system process
	ferm domain-containing protein 3	neurological system process
	fibrinogen c domain-containing protein 1	neurological system process
	filamin-b	neurological system process
	fizzy-related protein 2	neurological system process
	frizzled-related protein 2	neurological system process
	G-protein coupled octopamine receptor, putative	neurological system process
	g-protein coupled receptor 64	neurological system process
	g-protein coupled receptor family c group 5 member c	neurological system process
	gaba receptor associated protein	neurological system process
	gamma-aminobutyric acid type b receptor subunit 2	neurological system process
	gastrin cholecystokinin type b receptor	neurological system process
	gipc pdz domain containing member 1	neurological system process
	glutamate ionotropic kainate 2	neurological system process
	glutamate ionotropic kainate 5	neurological system process
	glutamate receptor InvGluR-K1 polypeptide	neurological system process
	glutathione peroxidase	neurological system process
	glycerol-3-phosphate acyltransferase mitochondrial	neurological system process
	glycine receptor subunit alpha-2	neurological system process
	guanine nucleotide regulatory protein	neurological system process
	guanine nucleotide-binding protein g subunit alpha	neurological system process
	heat shock protein 22 isoform 2	neurological system process
	heparan sulfate glucosamine 3-o-sulfotransferase 5	neurological system process
	heterogeneous nuclear ribonucleoprotein k	neurological system process
	histamine h3 receptor	neurological system process
	histone acetyltransferase myst1-like	neurological system process
	homer protein homolog 2	neurological system process
	inositol -trisphosphate receptor type 1	neurological system process
	inositol -trisphosphate type 1	neurological system process
	Inwardly rectifying potassium channel CG6747-PA	neurological system process
	kelch-like protein 20	neurological system process
	kh domain-containing protein	neurological system process
	kinesin heavy chain 1	neurological system process
	lipoxygenase homology domain-containing protein 1	neurological system process
	lysosomal alpha-glucosidase	neurological system process
	malignant fibrous histiocytoma-amplified sequence 1 homolog	neurological system process
	melatonin receptor type 1a	neurological system process
	mesencephalic astrocyte-derived neurotrophic factor homolog	neurological system process
	metabotropic glutamate receptor 7	neurological system process
	mitochondrial import inner membrane translocase subunit tim14-like	neurological system process
	mitochondrial import inner membrane translocase subunit tim9	neurological system process
	monoglyceride lipase	neurological system process
	munc18-1-interacting protein 1	neurological system process
	myoferlin	neurological system process
	myosin light chain smooth muscle	neurological system process
	myosin-iiia	neurological system process
	myosin-iiib	neurological system process
	myotubularin-related protein 13	neurological system process
	N-ethylmaleimide sensitive fusion protein, putative	neurological system process
	na+ k+-atpase alpha subunit	neurological system process
	nephrocystin-3	neurological system process
	neurexin-1-alpha	neurological system process
	neurexin-2-alpha	neurological system process
	neuronal acetylcholine receptor subunit alpha-6	neurological system process
	neuronal acetylcholine receptor subunit alpha-9	neurological system process
	neuropeptide receptor A26	neurological system process
	nicotinic acetylcholine receptor subunit type D	neurological system process
	nipped-b-like protein	neurological system process
	NIPSNAP1 protein, putative	neurological system process
	nischarin	neurological system process
	nuclear hormone receptor family member nhr-48	neurological system process
	ornithine cyclodeaminase	neurological system process
	p2x purinoceptor 5	neurological system process
	palmitoyltransferase zdhhc2	neurological system process
	pendrin	neurological system process
	peroxisomal acyl- oxidase 1a	neurological system process
	phosphatidylinositol transfer protein beta isoform	neurological system process
	phospholipase C beta	neurological system process
	polycystic kidney disease 2-like 1 protein	neurological system process
	polycystic kidney disease protein 1-like 2	neurological system process
	potassium channel subfamily k member 9	neurological system process
	potassium channel subfamily t member 2	neurological system process
	potassium voltage-gated channel subfamily a member 10	neurological system process
	potassium-dependent Na/Ca exchanger NCKX3	neurological system process
	prestin	neurological system process
	probable calcium-binding protein cml13	neurological system process
	probable glycosyltransferase	neurological system process
	probable peptidylglycine alpha-hydroxylating monooxygenase	neurological system process
	probable small nuclear ribonucleoprotein g-like	neurological system process
	probable voltage-gated potassium channel subunit beta-like	neurological system process
	proline-rich transmembrane protein 1	neurological system process
	protein shroom3	neurological system process
	protein tilb homolog	neurological system process
	protocadherin-15 precursor, putative	neurological system process
	protocadherin-16 precursor, putative	neurological system process
	px domain-containing protein kinase-like protein	neurological system process
	ral guanine nucleotide dissociation stimulator-like 1	neurological system process
	ras-related protein rab-2a	neurological system process
	ras-related protein rabb1c	neurological system process
	ras-specific guanine nucleotide-releasing factor 1	neurological system process
	ras-specific guanine nucleotide-releasing factor 2	neurological system process
	retinol dehydrogenase 10-a	neurological system process
	rhodopsin	neurological system process
	ribosome maturation protein sbds	neurological system process
	sarco/endoplasmic reticulum-type Ca-2+-ATPase	neurological system process
	sepiapterin reductase	neurological system process
	seprase	neurological system process
	serotonin	neurological system process
	serotonin receptor 1b (5-ht1b)	neurological system process
	sialin	neurological system process
	sine oculis-binding protein homolog	neurological system process
	small conductance calcium-activated potassium channel protein 2	neurological system process
	sodium-coupled neutral amino acid transporter 1-like	neurological system process
	solute carrier family 1 (glial high affinityglutamate transporter) member 3	neurological system process
	solute carrier family 12 (potassium chloride transporters) member 1	neurological system process
	solute carrier family 26 member 9	neurological system process
	solute carrier family 6 (neurotransmitter transporter) member 14	neurological system process
	solute carrier family 6, member9	neurological system process
	stoned b-like protein	neurological system process
	synaptotagmin I	neurological system process
	temptin	neurological system process
	transient receptor potential cation channel subfamily m member 2	neurological system process
	transient receptor potential cation channel subfamily m member 3	neurological system process
	transmembrane channel-like protein 7	neurological system process
	trinucleotide repeat-containing gene 18 protein	neurological system process
	triose phosphate phosphate chloroplastic	neurological system process
	Tropomodulin	neurological system process
	troponin c-	neurological system process
	tudor domain-containing protein 7a	neurological system process
	type 7 serotonin receptor	neurological system process
	tyrosine-protein phosphatase non-receptor type 13	neurological system process
	u6 snrna-associated sm-like protein lsm7	neurological system process
	u6 snrna-associated sm-like protein lsm7-like	neurological system process
	unconventional myosin-ib	neurological system process
	unconventional myosin-va	neurological system process
	usick-kaufman bardet-biedl syndromes chaperonin	neurological system process
	v-type proton atpase 116 kda subunit a isoform 1	neurological system process
	v-type proton atpase 116 kda subunit a isoform 2	neurological system process
	vacuolar-type h+ transporting atpase b1 subunit	neurological system process
	voltage-dependent anion-selective channel protein 2	neurological system process
	yippee	neurological system process
	zinc finger protein, putative	neurological system process
	calcium/calmodulin-dependent serine protein kinase 1	neuromuscular junction
	histone deacetylase 4	neuromuscular junction
	histone deacetylase 4, 5, putative	neuromuscular junction
	homolog subfamily a member mitochondrial	neuromuscular junction
	phosphorylase b kinase gamma catalytic skeletal muscle isoform	neuromuscular junction
	insulysin	neuromuscular junction development
	skeletal receptor tyrosine-protein kinase	neuromuscular junction development
	ubiquitin ribosomal protein s27a fusion protein	neuromuscular junction development
	cell division control protein 42	neuromuscular synaptic transmission
	16s ribosomal rna	neuron death
	40s ribosomal protein s3	neuron death
	apoptosis regulator bcl-2	neuron death
	baculoviral iap repeat-containing protein 3	neuron death
	baculoviral iap repeat-containing protein 7	neuron death
	bah and coiled-coil domain-containing protein 1-like	neuron death
	beta-amyloid precursor protein	neuron death
	canalicular multispecific organic anion transporter 2	neuron death
	death-inducer obliterator 1	neuron death
	disintegrin and metalloproteinase domain-containing protein 10	neuron death
	glutamate--cysteine ligase regulatory subunit	neuron death
	glyceraldehyde 3-phosphate dehydrogenase	neuron death
	glyceraldehyde-3-phosphate dehydrogenase	neuron death
	heat shock protein 105 kda	neuron death
	inhibitor of apoptosis	neuron death
	inhibitor of apoptosis 3	neuron death
	neutrophil cytosol factor 2	neuron death
	peroxisome proliferator-activated receptor gamma coactivator 1-alpha	neuron death
	receptor-type tyrosine-protein phosphatase mu	neuron death
	receptor-type tyrosine-protein phosphatase o	neuron death
	ring finger protein 207	neuron death
	srsf protein kinase 2	neuron death
	tripartite motif-containing protein 2	neuron death
	tripartite motif-containing protein 5	neuron death
	tripartite motif-containing protein 6	neuron death
	unconventional myosin-ie	neuron death
	myosin-viia	neuron development
	40s ribosomal protein s3-like	neuron projection
	activated cdc42 kinase 1	neuron projection
	acyl-coenzyme a dehydrogenase member 8	neuron projection
	adenylate kinase isoenzyme 1	neuron projection
	alpha-amidating enzyme precursor 1	neuron projection
	ankyrin repeat domain-containing protein 27	neuron projection
	ap-3 complex subunit delta-1	neuron projection
	cad protein	neuron projection
	calcitonin receptor	neuron projection
	calponin-like protein	neuron projection
	CAZ-associated structural protein,	neuron projection
	chloride channel protein 3	neuron projection
	connector enhancer of kinase suppressor of ras 3	neuron projection
	contactin-associated 2	neuron projection
	copine-5	neuron projection
	copine-8	neuron projection
	cysteine-rich pdz-binding	neuron projection
	drebrin-like protein	neuron projection
	e3 ubiquitin-protein ligase	neuron projection
	ELKS/RAB6-interacting/CAST family member 2	neuron projection
	estrogen receptor	neuron projection
	ferm domain-containing protein 5	neuron projection
	fructose-bisphosphate cytoplasmic isozyme	neuron projection
	g beta-like protein	neuron projection
	g protein-coupled receptor kinase 1	neuron projection
	galectin-3-binding protein b	neuron projection
	glycogen phosphorylase	neuron projection
	heat shock protein 70	neuron projection
	heterogeneous nuclear ribonucleoproteins a1 homolog	neuron projection
	homolog subfamily c member 7	neuron projection
	kin of irre-like protein 3	neuron projection
	kinesin light chain	neuron projection
	large neutral amino acids transporter small subunit 1	neuron projection
	long-chain specific acyl- mitochondrial	neuron projection
	macoilin-1	neuron projection
	macoilin-2	neuron projection
	macrophage scavenger receptor types i and ii	neuron projection
	matrix metalloproteinase	neuron projection
	membrane metallo-endopeptidase-like 1	neuron projection
	myotubularin-related protein 3	neuron projection
	nesprin-1	neuron projection
	neurensin-1	neuron projection
	neuroendocrine convertase 1	neuron projection
	neurofilament, heavy polypeptide	neuron projection
	neurotrypsin	neuron projection
	p63 73-like protein	neuron projection
	peripheral plasma membrane protein cask	neuron projection
	polyglutamine binding protein 1, isoform CRA_a	neuron projection
	probable nadh dehydrogenase iron-sulfur protein mitochondrial	neuron projection
	probable protein phosphatase 2c 13-like	neuron projection
	protein phosphatase 1b	neuron projection
	protein spa1-related 3-like	neuron projection
	protein ubash3a homolog	neuron projection
	protein wwc2	neuron projection
	purine-rich binding protein-alpha	neuron projection
	receptor of activated kinase c	neuron projection
	repressor of rna polymerase iii transcription maf1 homolog	neuron projection
	retinitis pigmentosa 9 protein	neuron projection
	sacsin	neuron projection
	scavenger receptor cysteine-rich protein type 12 precursor,	neuron projection
	septin-11	neuron projection
	smt3 suppressor of mif two 3 homolog 1	neuron projection
	soluble scavenger receptor cysteine-rich domain-containing protein ssc5d	neuron projection
	solute carrier family 8 (sodium/calcium exchanger), member 4b	neuron projection
	src substrate cortactin	neuron projection
	SRCR domain, membrane form 2,	neuron projection
	sumo-conjugating enzyme sce1-like	neuron projection
	transcriptional corepressor leunig- 2	neuron projection
	tribolium castaneum g protein-coupled receptor kinase 1 cg40129-pa	neuron projection
	tyrosine-protein phosphatase non-receptor type 14	neuron projection
	tyrosine-protein phosphatase non-receptor type 4	neuron projection
	ubx domain-containing protein 1	neuron projection
	Zinc transporter SLC39A7	neuron projection
	afg3-like protein 2	neuron projection development
	myosin-ia	neuron projection membrane
	unconventional myosin-id	neuron projection membrane
	60s ribosomal protein l10	neuronal cell body
	allograft inflammatory factor 1-like	neuronal cell body
	camp and camp-inhibited cgmp 3 -cyclic phosphodiesterase 10a	neuronal cell body
	dead-box atp-dependent rna helicase 37-like	neuronal cell body
	elongation factor 1-alpha	neuronal cell body
	elongation factor-1 alpha	neuronal cell body
	host cell factor 1	neuronal cell body
	nucleoporin-like protein rip	neuronal cell body
	peptidylglycine alpha-hydroxylating monooxygenase	neuronal cell body
	pl10-like protein	neuronal cell body
	polycystic kidney disease protein 2	neuronal cell body
	probable atp-dependent rna helicase ddx4	neuronal cell body
	probable protein disulfide-isomerase a6	neuronal cell body
	procollagen- 2-oxoglutarate 4-	neuronal cell body
	protein disulfide isomerase	neuronal cell body
	protein disulfide-isomerase a3	neuronal cell body
	ribosomal protein l10	neuronal cell body
	vesicle transport v-snare 13-like	neuronal cell body
	fmrfamide receptor	neuropeptide receptor activity
	neuropeptide s receptor	neuropeptide receptor activity
	band -like protein 3	neuropeptide signaling pathway
	carboxyl ester lipase	neurotransmitter binding
	muscarinic acetylcholine receptor dm1	neurotransmitter binding
	neuronal acetylcholine receptor subunit alpha-10	neurotransmitter binding
	neuropeptide Y	neurotransmitter binding
	Neuropeptide Y receptor type 6	neurotransmitter binding
	sodium- and chloride-dependent gaba transporter 1	neurotransmitter binding
	sodium- and chloride-dependent glycine transporter 2	neurotransmitter binding
	G-protein receptor, putative	neurotransmitter receptor activity
	nicotinic acetylcholine receptor subunit type K	neurotransmitter receptor activity
	chaperone protein	neurotransmitter transport
	protein unc-13 homolog a	neurotransmitter transport
	rab-3-interacting molecule unc-10	neurotransmitter transport
	sodium-dependent neutral amino acid transporter b at1	neurotransmitter transport
	SYB_LOLPE RecNSynaptobrevin	neurotransmitter transport
	syntaxin-related protein knolle-like	neurotransmitter transport
	sodium- and chloride-dependent taurine transporter	neurotransmitter transporter activity
	sodium-dependent proline transporter	neurotransmitter transporter activity
	synaptic vesicular amine transporter	neurotransmitter transporter activity
	eukaryotic translation initiation factor 2-alpha kinase 3	regulation of action potential in neuron
	loxodonta africana ras-related protein rab-8a-like	regulation of neuronal synaptic plasticity
	4-aminobutyrate mitochondrial	regulation of neurotransmitter levels
	adenine nucleotide translocator	regulation of neurotransmitter levels
	calcium-dependent secretion activator 1- 1	regulation of neurotransmitter levels
	carboxyl-terminal pdz ligand of neuronal nitric oxide synthase protein	regulation of neurotransmitter levels
	carnitine o-acetyltransferase	regulation of neurotransmitter levels
	carnitine o-palmitoyltransferase mitochondrial	regulation of neurotransmitter levels
	dynein light chain cytoplasmic-like	regulation of neurotransmitter levels
	exocyst complex component 2	regulation of neurotransmitter levels
	exocyst complex component 5	regulation of neurotransmitter levels
	exocyst complex component 6b	regulation of neurotransmitter levels
	fragile x mental retardation protein 1 homolog a	regulation of neurotransmitter levels
	glutaminase kidney mitochondrial	regulation of neurotransmitter levels
	glutamine synthetase	regulation of neurotransmitter levels
	gtp-binding protein gb2	regulation of neurotransmitter levels
	latrophilin-1	regulation of neurotransmitter levels
	meleagris gallopavo adaptor-related protein complex beta 2 subunit	regulation of neurotransmitter levels
	monoamine oxidase A	regulation of neurotransmitter levels
	nadh dehydrogenase iron-sulfur protein mitochondrial	regulation of neurotransmitter levels
	otoferlin	regulation of neurotransmitter levels
	potassium voltage-gated channel subfamily c member 2	regulation of neurotransmitter levels
	protein kinase c and casein kinase substrate in neurons protein 1	regulation of neurotransmitter levels
	ras-related protein rab-40c	regulation of neurotransmitter levels
	rho guanine nucleotide exchange factor 12	regulation of neurotransmitter levels
	schistosoma mansoni high voltage-activated calcium channel cav2b	regulation of neurotransmitter levels
	Sodium- and chloride-dependent creatine transporter 1	regulation of neurotransmitter levels
	sodium-dependent dopamine transporter	regulation of neurotransmitter levels
	solute carrier family 22, member 15	regulation of neurotransmitter levels
	synapsin isoform 8.2	regulation of neurotransmitter levels
	synaptotagmin-c	regulation of neurotransmitter levels
	tyrosine-protein kinase transmembrane receptor ror2	regulation of neurotransmitter levels
	voltage-dependent calcium channel type a subunit alpha-1	regulation of neurotransmitter levels
	voltage-dependent t-type calcium channel subunit alpha-1g	regulation of neurotransmitter levels
	x-box binding protein 1	regulation of neurotransmitter levels
	zinc transporter 10-like	regulation of neurotransmitter levels
	fch and double sh3 domains protein 1	synaptic growth at neuromuscular junction
Vision	phospholipase c beta	visual perception
	nucleoside diphosphate kinase mrna	visual perception
	phosphatidylinositol transfer membrane-associated 1 mrna	visual perception
	PREDICTED: similar to calmodulin-binding transcription activator	visual perception
	calmodulin	visual perception
	cadherin-23	visual perception
	palmitoyl-protein thioesterase 1	visual perception
	fat-like cadherin-related tumor suppressor homolog	visual perception
	protein kinase brain isozyme	visual perception
	unconventional myosin-xv	visual perception
	nuclear factor interleukin-3-regulated protein	visual perception
	solute carrier family 4 (anion exchanger) member 4	visual perception
	ATP-binding cassette transporter sub-family A	visual perception
	fibrillar collagen	visual perception
	peptidyl-prolyl cis-trans isomerase fkbp20-1	visual perception
	77 kda echinoderm microtubule-associated protein	visual perception
	jnk/sapk-associated protein, putative	visual perception
	calcium voltage- l alpha 1d subunit transcript variant mrna	visual perception
	transient receptor potential cation channel subfamily m member 1	visual perception
	e3 ubiquitin-protein ligase cop1-like mrna	visual perception
Retina(l)*	gq-coupled rhodpsin	11-cis retinal binding
	swi snf matrix actin dependent regulator of subfamily member 4 transcript variant mrna	neural retina development
	transcription activator brg1	neural retina development
	low-density lipoprotein receptor-related protein 2	response to retinoic acid
	hyperpolarizaion-activated cyclic nucleotide-gated cation channel	retina development in camera-type eye
	hypoxia-inducible factor 1 alpha	retina development in camera-type eye
	inosine-5 -monophosphate dehydrogenase 1a	retina development in camera-type eye
	nonmuscle myosin II	retina development in camera-type eye
	plasma membrane calcium ATPase	retina development in camera-type eye
	potassium sodium hyperpolarization-activated cyclic nucleotide-gated channel 4	retina development in camera-type eye
	ribosomal protein l24 mrna	retina development in camera-type eye
	aldehyde dehydrogenase	retinal binding
	alcohol dehydrogenase	retinal dehydrogenase activity
	non-functional nadph-dependent codeinone reductase 2	retinal dehydrogenase activity
* - Retina(l) refers to GO terms related to the retina and GO terms related to the molecule retinal, a vitamin A derivative that binds opsin to form the visual pigment.
