# Supplementary material for: De Novo Assembly and Characterization of Two Transcriptomes Reveal Multiple Light-Mediated Functions in the Scallop Eye (Bivalvia: Pectinidae)
Source: PLoS One. 2013 Jul 29;8(7):e69852. doi: 10.1371/journal.pone.0069852 (PMC3726758; doi:10.1371/journal.pone.0069852)
Supplement: Table S4 — List of genes identified in KEGG pathways related to light detection in the adult eye transcriptomes of A. irradians and P. magellanicus . KEGG pathways were identified using the KEGG Automatic Annotation Server (www.genome.jp/tools/kaas). (XLSX) [file pone.0069852.s007.xlsx]

## Sheet: Additonal file-KEGG ID genes
Table S4. List of genes identified in KEGG pathways related to light detection in the adult eye transcriptomes of A. irradians and P. magellanicus. KEGG pathways were identified using the KEGG Automatic Annotation Server (www.genome.jp/tools/kaas).
	Gene Name
KEGG Pathway	A. irradians	P. magellanicus
Phototransduction	rhodopsin	beta-arrestin
	calmodulin	guanine nucleotide binding protein (G protein), beta 1
	actin beta/gamma 1	calmodulin
	calcium/calmodulin-dependent protein kinase (CaM kinase) II	guanine nucleotide binding protein (G protein), alpha q polypeptide
		phospholipase C, beta
		classical protein kinase C
Circadian rhythm - mammal		casein kinase 1, delta
		cryptochrome
		ARNTL, BMAL1, CYC; aryl hydrocarbon receptor nuclear translocator-like protein 1
		circadian locomoter output cycles kaput protein (CLOCK)
		RING-box protein 1
		S-phase kinase-associated protein 1
		F-box and WD-40 domain protein 1/11
Circadian rhythm - fly	hepatic leukemia factor	timeless
		circadian locomoter output cycles kaput protein (CLOCK)
		ARNTL, BMAL1, CYC; aryl hydrocarbon receptor nuclear translocator-like protein 1
		hepatic leukemia factor
